# Supplementary material
Source: Springer Nature journal article supplement (https://www.springermedizin.de/resource/supplementary/12894_2012_225_MOESM2_ESM.pdf/9513222)

### CGI-I age

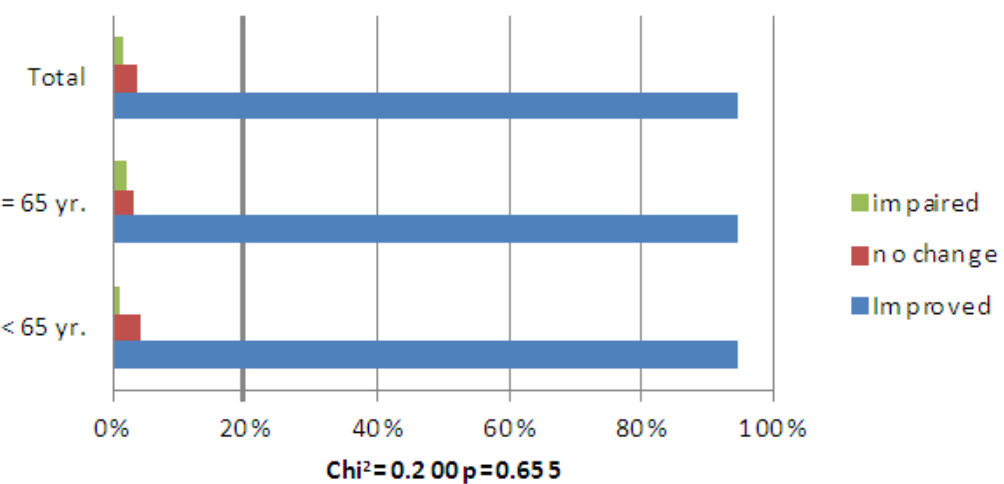

### TBS age

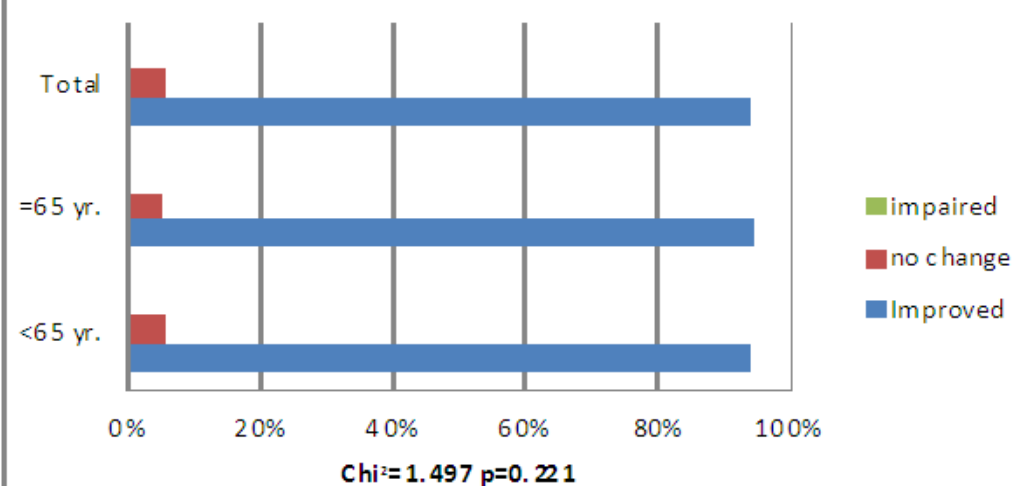

### CGI-I dose

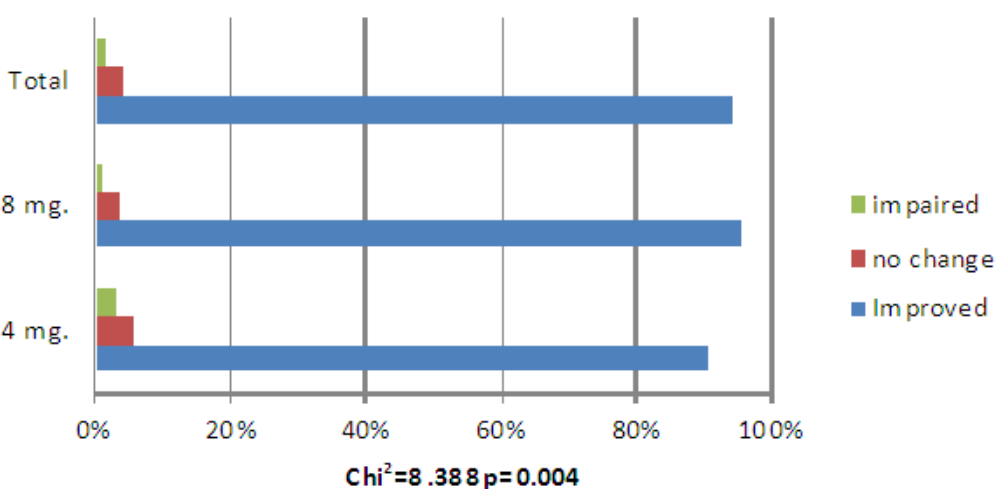

### TBS dose

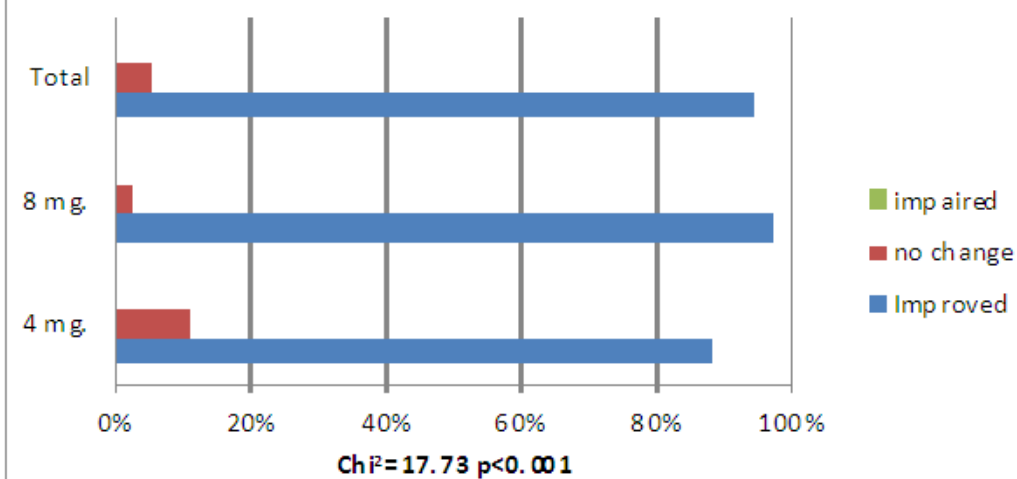

Supplement: MOESM2 [file 9513222]
